# Supplementary material
Source: PubMed Central journal article supplement (PMC117346)

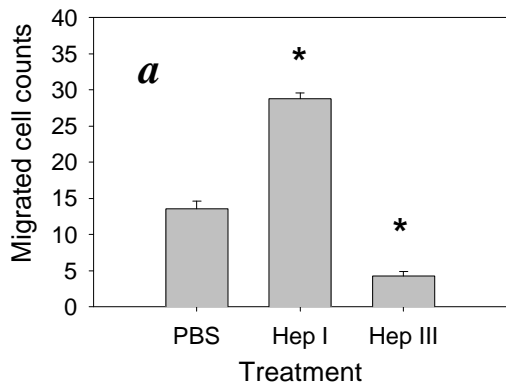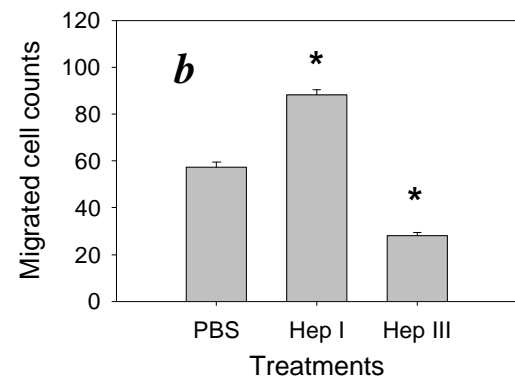

Supplement: pnas_99_2_568__10.pdf [file pnas_99_2_568__10.pdf]

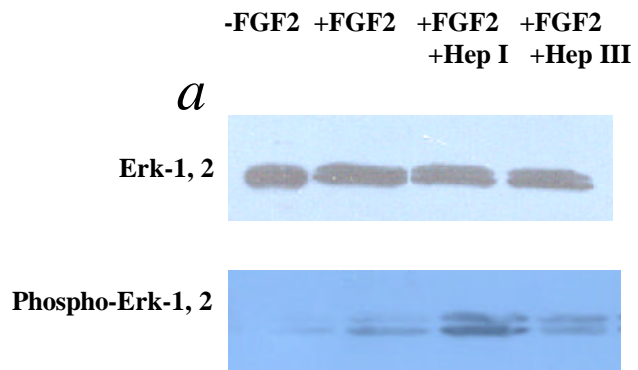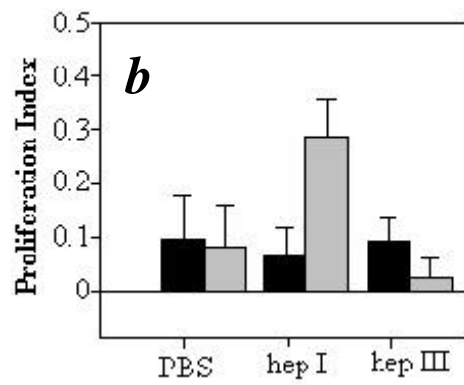

Supplement: pnas_99_2_568__11.pdf [file pnas_99_2_568__11.pdf]

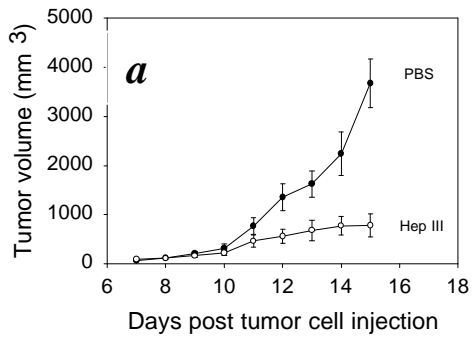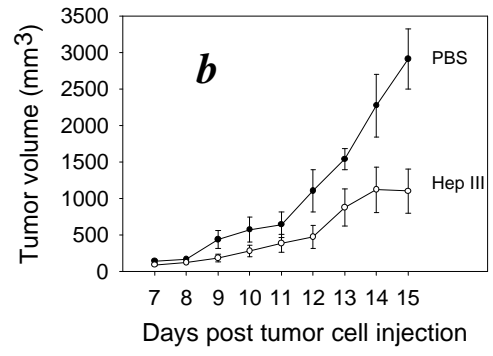

Supplement: pnas_99_2_568__7.pdf [file pnas_99_2_568__7.pdf]

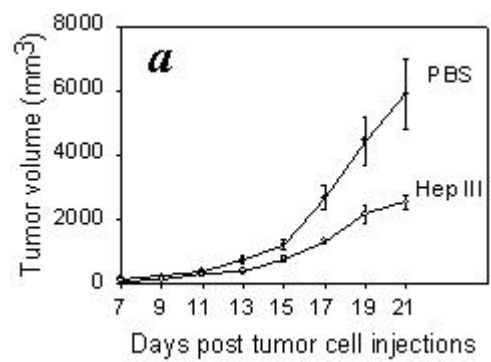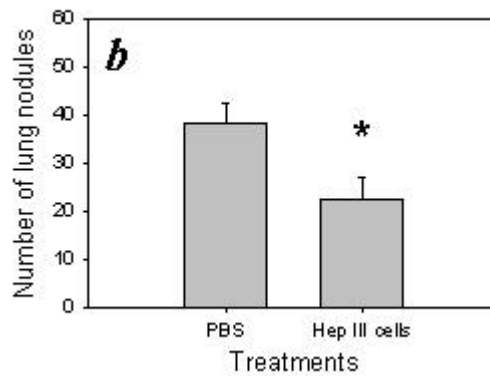

Supplement: pnas_99_2_568__8.pdf [file pnas_99_2_568__8.pdf]

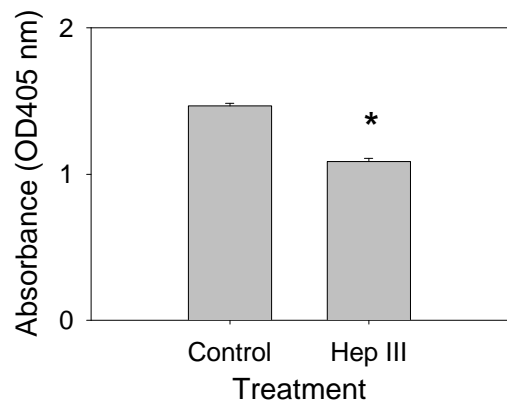

Supplement: pnas_99_2_568__9.pdf [file pnas_99_2_568__9.pdf]
